# Supplementary material
Source: HighWire-hosted journal article supplement (http://thorax.bmjjournals.com/highwire/filestream/173990/field_highwire_adjunct_files/0/62121088webonlyapp1.pdf)

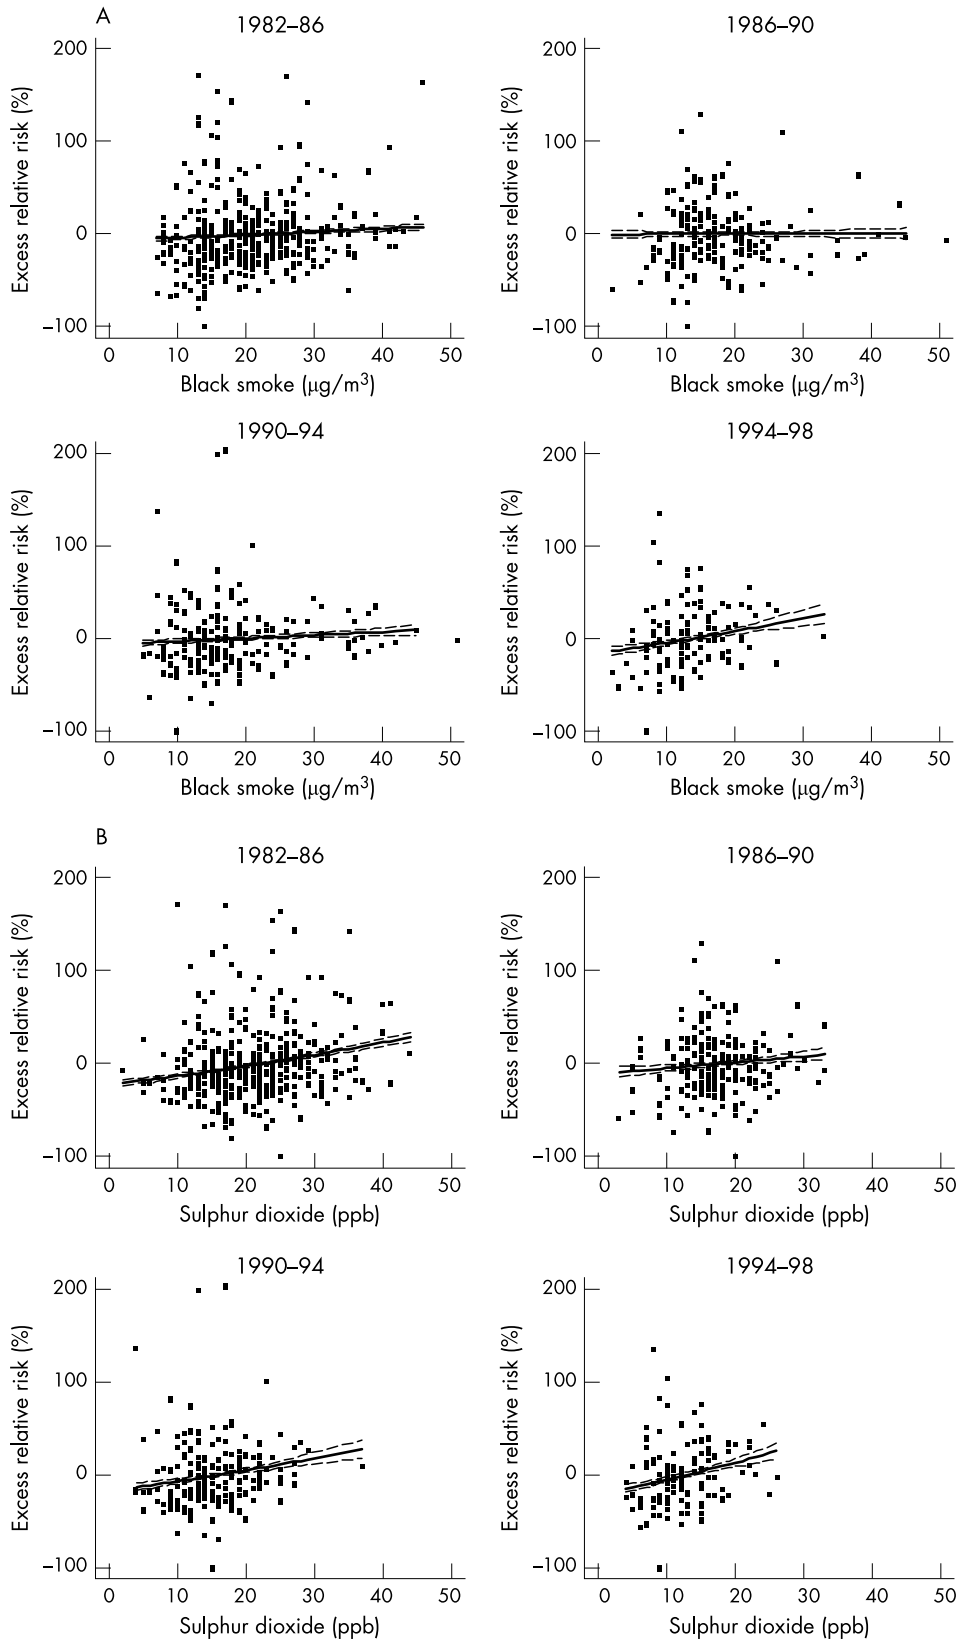

Supplement: 62121088webonlyapp1.pdf [file 62121088webonlyapp1.pdf]
